# Supplementary material for: Tau GSTs involved in regulation of leaf abscission by comparison the gene profiling of MeGSTs in various abscission-promoting treatments in cassava abscission zones
Source: BMC Genet. 2018 Jul 13;19:45. doi: 10.1186/s12863-018-0627-6 (PMC6043963; doi:10.1186/s12863-018-0627-6)
Supplement: Supplementary file 1 — Data 1. Primers used in qRT-PCR analysis. (XLS 39 kb) [file 12863_2018_627_MOESM1_ESM.xls]

## Sheet: Sheet1
Data 1. Primers used in qRT-PCR analysis (the primers were designed to span intron-exon boundaries or target the untranslated regions.)
Gene Name	Forward Primer	Reverse Primer
MeGSTF3	CTCAGGATGCAGCCTTTTGGC	GCCCTTCAGCCTCTAGCCACTG
MeGSTF6	TCAAATTACAGCCTTTCGGAGCG	GAAATCCCAGAGCCGAGGCAA
MeGSTL2	ATCTGGTCCTGCTTTCGATTACTTGG	CTTGTTCATCTCCTCAATCCAAGCTG
MeGSTU3	GATGAAAAGATCTTGCAGACAGCACTC	GGATGTTTCTCTTCATGGATCAGCTC
MeGSTU6	CGATGAAAAGATCGTTCAAACAGCTT	CTGGAAACTTCTCTTCATTGATCCAATC
MeGSTU8	GACGAACAGTGCAATCATGC	AAGCCAGAACCCTATTATGT
MeGSTU11	GACCAAGTTTGAAGAGGACAAGACCC	CTTCAAGCCAGCCAGCTATCCATC
MeGSTU13	TTGCAGAACAGAAGATTTTGGAAGCTG	ATCCATCCTGCGGCAATGTCC
MeGSTU14	TTGCTGATGACAAGTGTCTGATTGGT	CAATATCCAAATACCCAATCTGCTCTCC
MeGSTU18	CGGTGATGAGAAGATCTTGCCAAC	GTAATAACCAATCCAACCCAATGCA
MeGSTU19	GCCGATGAAAAGATATTACAAGCAATG	CAATCCAACCCAAAGCTAGATCCACTAG
MeGSTU20	TGGCGATGATAAGGTATTACCATCAATAG	GATCCACTAATCCAATTTCCTCTCCTCC
MeGSTU27	GAGGATTTCCCTAAGATCAT	TGTAAAAGCCCTGTGCTCTT
MeGSTU34	GTGCTTGGCAAAGGAGTCTG	CCTTTCTAAGCAATGGCCTC
MeGSTU30	GATAAAAAGATTCAAGGTGCCAGTTATCG	ATCTACAAACCCAAATGTCTCTCCTCC
MeGSTU35	AGAACATTTGCTTCCAGAGAGAAACACT	ATTTCACTTGCGTAACTTCTTGATTGAC
MeGSTU5	TCGATGAAAAGATCGTTCAAACAGCT	TGACCCACTTGGAACCAATACACTAA
MeGSTU7	AAAGTGCAATCCTGCGGTGT	CAGCTCACCTTCAAGTGTT
MeGSTU9	AAGATAAGGATTCCTTAGCG	CAGGCTATGTCCACCATGC
MeGSTZ2	AGGCTTTGCAGCATTGGAGAAGC	CTTGATAGAAGAGGGAACTGAGTCATGTC
